# Supplementary material
Source: PubMed Central journal article supplement (PMC4677487)
Supplement: NIHMS739843-supplement-Suppl_Table_1.pdf [file NIHMS739843-supplement-Suppl_Table_1.pdf]

**Supplementary Table 1. Eighteen miRNAs whose expression levels are correlated with iGrowth in both CEU and YRI samples**

| miRNA                       | iGrowth raw p values |            |
|-----------------------------|----------------------|------------|
|                             | <i>CEU</i>           | <i>YRI</i> |
| hsa-let-7d                  | 0.02833046           | 0.1196481  |
| hsa-miR-148b                | 0.0029303            | 0.00465769 |
| hsa-miR-185*                | 0.0068943            | 0.03976238 |
| hsa-miR-18a                 | 0.00920889           | 1.53E-06   |
| hsa-miR-18b                 | 0.03720755           | 2.48E-06   |
| hsa-miR-193b                | 0.02716574           | 0.02180195 |
| hsa-miR-196a*               | 0.00478224           | 0.03530713 |
| hsa-miR-210                 | 0.0004309            | 1.41E-06   |
| hsa-miR-331-3p              | 0.04736953           | 0.12969614 |
| hsa-miR-34a                 | 0.00800108           | 0.08214981 |
| hsa-miR-365                 | 0.01005646           | 0.02635361 |
| hsa-miR-518a-5p/hsa-miR-527 | 0.04660004           | 0.00041619 |
| hsa-miR-600                 | 0.00182647           | 0.01054308 |
| hsa-miR-765                 | 0.03224653           | 4.72E-05   |
| hsa-miR-768-3p              | 0.03623567           | 0.00058002 |
| hsa-miR-768-5p              | 0.00244068           | 6.51E-06   |
| hsa-miR-939                 | 0.03461726           | 0.02167831 |
| miRPlus_42521               | 0.04934229           | 0.03895866 |

In YRI samples, all identified miRNAs are correlated with iGrowth at FDR<0.05; while in CEU samples, raw p<0.05 was used for data filtering.
