# Supplementary material
Source: PubMed Central journal article supplement (PMC4677487)
Supplement: NIHMS739843-supplement-Suppl_Table_2.pdf [file NIHMS739843-supplement-Suppl_Table_2.pdf]

**Supplementary Table 2. GO analysis on targets of iGrowth associated miRNA in both CEU and YRI samples**

| <b>Category</b> | <b>Term</b>                                               | <b>PValue</b> |
|-----------------|-----------------------------------------------------------|---------------|
| GOTERM_BP_ALL   | immune system process                                     | 5.42E-06      |
| GOTERM_BP_ALL   | response to oxygen levels                                 | 7.47E-05      |
| GOTERM_BP_ALL   | regulation of immune system process                       | 1.20E-04      |
| GOTERM_BP_ALL   | immune response                                           | 5.20E-04      |
| GOTERM_BP_ALL   | regulation of lymphocyte activation                       | 5.36E-04      |
| GOTERM_BP_ALL   | negative regulation of biological process                 | 5.57E-04      |
| GOTERM_BP_ALL   | positive regulation of biological process                 | 0.001138732   |
| GOTERM_BP_ALL   | regulation of leukocyte activation                        | 0.001216061   |
| GOTERM_BP_ALL   | response to hypoxia                                       | 0.001224492   |
| GOTERM_BP_ALL   | positive regulation of immune system process              | 0.001342152   |
| GOTERM_BP_ALL   | cellular localization                                     | 0.001357963   |
| GOTERM_BP_ALL   | response to chemical stimulus                             | 0.001567713   |
| GOTERM_BP_ALL   | regulation of cell activation                             | 0.001753154   |
| GOTERM_BP_ALL   | response to stimulus                                      | 0.002188004   |
| GOTERM_BP_ALL   | regulation of T cell activation                           | 0.002426228   |
| GOTERM_BP_ALL   | regulation of molecular function                          | 0.002514211   |
| GOTERM_BP_ALL   | protein localization                                      | 0.002905823   |
| GOTERM_BP_ALL   | regulation of cell proliferation                          | 0.002929773   |
| GOTERM_BP_ALL   | regulation of cell growth                                 | 0.003511074   |
| GOTERM_BP_ALL   | negative regulation of cellular process                   | 0.003523066   |
| GOTERM_BP_ALL   | establishment of localization in cell                     | 0.003806643   |
| GOTERM_BP_ALL   | cellular process                                          | 0.004012806   |
| GOTERM_BP_ALL   | protein transport                                         | 0.004162102   |
| GOTERM_BP_ALL   | negative regulation of catalytic activity                 | 0.004309638   |
| GOTERM_BP_ALL   | negative regulation of cellular metabolic process         | 0.004532435   |
| GOTERM_BP_ALL   | establishment of protein localization                     | 0.004632976   |
| GOTERM_BP_ALL   | proteasomal protein catabolic process                     | 0.005323438   |
| GOTERM_BP_ALL   | proteasomal ubiquitin-dependent protein catabolic process | 0.005323438   |
| GOTERM_BP_ALL   | negative regulation of metabolic process                  | 0.005462267   |
| GOTERM_BP_ALL   | negative regulation of macromolecule metabolic process    | 0.005628749   |
| GOTERM_BP_ALL   | negative regulation of gene expression                    | 0.005931185   |
| GOTERM_BP_ALL   | negative regulation of molecular function                 | 0.006453741   |
| GOTERM_BP_ALL   | regulation of alpha-beta T cell differentiation           | 0.006752721   |
| GOTERM_BP_ALL   | regulation of catalytic activity                          | 0.006986991   |
| GOTERM_BP_ALL   | response to extracellular stimulus                        | 0.007919127   |
| GOTERM_BP_ALL   | regulation of caspase activity                            | 0.007930912   |
| GOTERM_BP_ALL   | positive regulation of macromolecule metabolic process    | 0.008108493   |
| GOTERM_BP_ALL   | regulation of B cell activation                           | 0.008222264   |
| GOTERM_BP_ALL   | cellular amino acid biosynthetic process                  | 0.008222264   |
| GOTERM_BP_ALL   | regulation of protein kinase activity                     | 0.008297546   |
| GOTERM_BP_ALL   | regulation of endopeptidase activity                      | 0.009248302   |
| GOTERM_BP_ALL   | macromolecule localization                                | 0.010015986   |
| GOTERM_BP_ALL   | positive regulation of protein ubiquitination             | 0.010205928   |

|               |                                                                                                |             |
|---------------|------------------------------------------------------------------------------------------------|-------------|
| GOTERM_BP_ALL | regulation of kinase activity                                                                  | 0.010649083 |
| GOTERM_BP_ALL | system development                                                                             | 0.010724083 |
| GOTERM_BP_ALL | negative regulation of protein modification process                                            | 0.011037173 |
| GOTERM_BP_ALL | carboxylic acid biosynthetic process                                                           | 0.011082968 |
| GOTERM_BP_ALL | organic acid biosynthetic process                                                              | 0.011082968 |
| GOTERM_BP_ALL | regulation of peptidase activity                                                               | 0.011229454 |
| GOTERM_BP_ALL | negative regulation of cell proliferation                                                      | 0.011624372 |
| GOTERM_BP_ALL | hemopoiesis                                                                                    | 0.012134482 |
| GOTERM_BP_ALL | serine family amino acid biosynthetic process                                                  | 0.012227795 |
| GOTERM_BP_ALL | positive regulation of cellular process                                                        | 0.012546559 |
| GOTERM_BP_ALL | response to UV                                                                                 | 0.013596973 |
| GOTERM_BP_ALL | ubiquitin-dependent protein catabolic process                                                  | 0.014149512 |
| GOTERM_BP_ALL | regulation of transferase activity                                                             | 0.014375562 |
| GOTERM_BP_ALL | antigen receptor-mediated signaling pathway                                                    | 0.014619119 |
| GOTERM_BP_ALL | regulation of phosphorylation                                                                  | 0.015137765 |
| GOTERM_BP_ALL | intracellular transport                                                                        | 0.015183409 |
| GOTERM_BP_ALL | myeloid cell differentiation                                                                   | 0.015358871 |
| GOTERM_BP_ALL | response to endoplasmic reticulum stress                                                       | 0.01585234  |
| GOTERM_BP_ALL | regulation of programmed cell death                                                            | 0.016442017 |
| GOTERM_BP_ALL | protein homooligomerization                                                                    | 0.016702558 |
| GOTERM_BP_ALL | regulation of lymphocyte differentiation                                                       | 0.016960008 |
| GOTERM_BP_ALL | positive regulation of vasoconstriction                                                        | 0.016988597 |
| GOTERM_BP_ALL | positive regulation of coagulation                                                             | 0.016988597 |
| GOTERM_BP_ALL | leukocyte differentiation                                                                      | 0.017061078 |
| GOTERM_BP_ALL | regulation of cell death                                                                       | 0.01706239  |
| GOTERM_BP_ALL | cellular response to extracellular stimulus                                                    | 0.017874774 |
| GOTERM_BP_ALL | positive regulation of metabolic process                                                       | 0.017910354 |
| GOTERM_BP_ALL | regulation of protein modification process                                                     | 0.017991242 |
| GOTERM_BP_ALL | regulation of alpha-beta T cell activation                                                     | 0.018489367 |
| GOTERM_BP_ALL | regulation of growth                                                                           | 0.018718333 |
| GOTERM_BP_ALL | anaphase-promoting complex-dependent proteasomal ubiquitin-dependent protein catabolic process | 0.018819708 |
| GOTERM_BP_ALL | negative regulation of ubiquitin-protein ligase activity during mitotic cell cycle             | 0.018819708 |
| GOTERM_BP_ALL | cortical cytoskeleton organization                                                             | 0.019617866 |
| GOTERM_BP_ALL | anatomical structure development                                                               | 0.019872646 |
| GOTERM_BP_ALL | positive regulation of cellular metabolic process                                              | 0.020171528 |
| GOTERM_BP_ALL | organ development                                                                              | 0.020229469 |
| GOTERM_BP_ALL | regulation of protein ubiquitination                                                           | 0.020397465 |
| GOTERM_BP_ALL | response to stress                                                                             | 0.020624116 |
| GOTERM_BP_ALL | regulation of phosphate metabolic process                                                      | 0.020660391 |
| GOTERM_BP_ALL | regulation of phosphorus metabolic process                                                     | 0.020660391 |
| GOTERM_BP_ALL | negative regulation of ligase activity                                                         | 0.020801086 |
| GOTERM_BP_ALL | negative regulation of ubiquitin-protein ligase activity                                       | 0.020801086 |
| GOTERM_BP_ALL | hemopoietic or lymphoid organ development                                                      | 0.021432588 |
| GOTERM_BP_ALL | regulation of multicellular organismal process                                                 | 0.0214391   |
| GOTERM_BP_ALL | positive regulation of ubiquitin-protein ligase activity during mitotic cell cycle             | 0.021837997 |

|               |                                                                                              |             |
|---------------|----------------------------------------------------------------------------------------------|-------------|
| GOTERM_BP_ALL | positive regulation of molecular function                                                    | 0.022005495 |
| GOTERM_BP_ALL | response to pH                                                                               | 0.022405414 |
| GOTERM_BP_ALL | cell cycle arrest                                                                            | 0.022852076 |
| GOTERM_BP_ALL | immune response-activating cell surface receptor signaling pathway                           | 0.022873678 |
| GOTERM_BP_ALL | negative regulation of cellular protein metabolic process                                    | 0.023267352 |
| GOTERM_BP_ALL | positive regulation of ubiquitin-protein ligase activity                                     | 0.024005319 |
| GOTERM_BP_ALL | regulation of ubiquitin-protein ligase activity during mitotic cell cycle                    | 0.025136107 |
| GOTERM_BP_ALL | multicellular organismal development                                                         | 0.027257334 |
| GOTERM_BP_ALL | regulation of apoptosis                                                                      | 0.027403533 |
| GOTERM_BP_ALL | positive regulation of ligase activity                                                       | 0.027492773 |
| GOTERM_BP_ALL | immune response-regulating cell surface receptor signaling pathway                           | 0.02777343  |
| GOTERM_BP_ALL | negative regulation of protein metabolic process                                             | 0.027897387 |
| GOTERM_BP_ALL | antigen processing and presentation of peptide antigen via MHC class I                       | 0.028433265 |
| GOTERM_BP_ALL | negative regulation of protein ubiquitination                                                | 0.028718942 |
| GOTERM_BP_ALL | negative regulation of transcription                                                         | 0.028941206 |
| GOTERM_BP_ALL | response to external stimulus                                                                | 0.029346351 |
| GOTERM_BP_ALL | induction of apoptosis                                                                       | 0.029368234 |
| GOTERM_BP_ALL | induction of programmed cell death                                                           | 0.029966795 |
| GOTERM_BP_ALL | sphingolipid metabolic process                                                               | 0.029977172 |
| GOTERM_BP_ALL | immune system development                                                                    | 0.030135354 |
| GOTERM_BP_ALL | negative regulation of nucleobase, nucleoside, nucleotide and nucleic acid metabolic process | 0.030699914 |
| GOTERM_BP_ALL | cysteine biosynthetic process                                                                | 0.031067968 |
| GOTERM_BP_ALL | nuclear fragmentation during apoptosis                                                       | 0.031067968 |
| GOTERM_BP_ALL | hydrogen sulfide metabolic process                                                           | 0.031067968 |
| GOTERM_BP_ALL | hydrogen sulfide biosynthetic process                                                        | 0.031067968 |
| GOTERM_BP_ALL | induction of apoptosis by extracellular signals                                              | 0.031334576 |
| GOTERM_BP_ALL | hexose metabolic process                                                                     | 0.031340337 |
| GOTERM_BP_ALL | negative regulation of caspase activity                                                      | 0.03166286  |
| GOTERM_BP_ALL | cellular response to stress                                                                  | 0.032420957 |
| GOTERM_BP_ALL | cellular response to stimulus                                                                | 0.032770008 |
| GOTERM_BP_ALL | regulation of ubiquitin-protein ligase activity                                              | 0.033945252 |
| GOTERM_BP_ALL | negative regulation of nitrogen compound metabolic process                                   | 0.033985071 |
| GOTERM_BP_ALL | response to organic substance                                                                | 0.034361393 |
| GOTERM_BP_ALL | regulation of tissue remodeling                                                              | 0.035029312 |
| GOTERM_BP_ALL | response to nutrient levels                                                                  | 0.035526271 |
| GOTERM_BP_ALL | developmental process                                                                        | 0.0362001   |
| GOTERM_BP_ALL | positive regulation of nucleobase, nucleoside, nucleotide and nucleic acid metabolic process | 0.036398398 |
| GOTERM_BP_ALL | macromolecule catabolic process                                                              | 0.037749702 |
| GOTERM_BP_ALL | alcohol metabolic process                                                                    | 0.037835313 |
| GOTERM_BP_ALL | amine biosynthetic process                                                                   | 0.038205004 |
| GOTERM_BP_ALL | regulation of ligase activity                                                                | 0.038205004 |
| GOTERM_BP_ALL | membrane lipid metabolic process                                                             | 0.038205004 |
| GOTERM_BP_ALL | positive regulation of apoptosis                                                             | 0.038438035 |
| GOTERM_BP_ALL | positive regulation of alpha-beta T cell differentiation                                     | 0.038527585 |

|               |                                                            |             |
|---------------|------------------------------------------------------------|-------------|
| GOTERM_BP_ALL | carbohydrate metabolic process                             | 0.039454337 |
| GOTERM_BP_ALL | positive regulation of gene expression                     | 0.040003278 |
| GOTERM_BP_ALL | positive regulation of RNA metabolic process               | 0.040132115 |
| GOTERM_BP_ALL | positive regulation of programmed cell death               | 0.040138723 |
| GOTERM_BP_ALL | positive regulation of cell death                          | 0.040777725 |
| GOTERM_BP_ALL | regulation of lymphocyte proliferation                     | 0.04120748  |
| GOTERM_BP_ALL | antigen processing and presentation                        | 0.04120748  |
| GOTERM_BP_ALL | cellular carbohydrate metabolic process                    | 0.041618989 |
| GOTERM_BP_ALL | negative regulation of peptidase activity                  | 0.042152766 |
| GOTERM_BP_ALL | regulation of leukocyte proliferation                      | 0.042757558 |
| GOTERM_BP_ALL | regulation of mononuclear cell proliferation               | 0.042757558 |
| GOTERM_BP_ALL | regulation of T cell differentiation                       | 0.04552474  |
| GOTERM_BP_ALL | lung alveolus development                                  | 0.045900064 |
| GOTERM_BP_ALL | regulation of cell differentiation                         | 0.046153779 |
| GOTERM_BP_ALL | positive regulation of nitrogen compound metabolic process | 0.046217463 |
| GOTERM_BP_ALL | homocysteine metabolic process                             | 0.046239711 |
| GOTERM_BP_ALL | cellular cation homeostasis                                | 0.046865071 |
| GOTERM_BP_ALL | immune response-activating signal transduction             | 0.047773167 |
| GOTERM_BP_ALL | T cell activation                                          | 0.04802654  |
| GOTERM_CC_ALL | cytoplasmic part                                           | 1.60E-07    |
| GOTERM_CC_ALL | endoplasmic reticulum                                      | 2.63E-05    |
| GOTERM_CC_ALL | endoplasmic reticulum part                                 | 8.99E-05    |
| GOTERM_CC_ALL | cytoplasm                                                  | 2.73E-04    |
| GOTERM_CC_ALL | intracellular membrane-bounded organelle                   | 2.81E-04    |
| GOTERM_CC_ALL | membrane-bounded organelle                                 | 2.96E-04    |
| GOTERM_CC_ALL | membrane part                                              | 3.51E-04    |
| GOTERM_CC_ALL | lytic vacuole                                              | 4.10E-04    |
| GOTERM_CC_ALL | lysosome                                                   | 4.10E-04    |
| GOTERM_CC_ALL | integral to membrane                                       | 0.001159476 |
| GOTERM_CC_ALL | endoplasmic reticulum lumen                                | 0.001398051 |
| GOTERM_CC_ALL | vacuole                                                    | 0.001750685 |
| GOTERM_CC_ALL | membrane                                                   | 0.001778966 |
| GOTERM_CC_ALL | protein complex                                            | 0.003599049 |
| GOTERM_CC_ALL | intracellular organelle                                    | 0.003696815 |
| GOTERM_CC_ALL | cytosol                                                    | 0.003801611 |
| GOTERM_CC_ALL | organelle                                                  | 0.003966721 |
| GOTERM_CC_ALL | intrinsic to membrane                                      | 0.004070481 |
| GOTERM_CC_ALL | organelle lumen                                            | 0.004111415 |
| GOTERM_CC_ALL | membrane-enclosed lumen                                    | 0.005797016 |
| GOTERM_CC_ALL | MHC class I peptide loading complex                        | 0.007794194 |
| GOTERM_CC_ALL | intracellular organelle lumen                              | 0.007898877 |
| GOTERM_CC_ALL | intracellular part                                         | 0.008132916 |
| GOTERM_CC_ALL | endoplasmic reticulum membrane                             | 0.008523363 |
| GOTERM_CC_ALL | nuclear envelope-endoplasmic reticulum network             | 0.012175058 |
| GOTERM_CC_ALL | cell part                                                  | 0.013320629 |
| GOTERM_CC_ALL | cell                                                       | 0.013443724 |

|               |                                                                                    |             |
|---------------|------------------------------------------------------------------------------------|-------------|
| GOTERM_CC_ALL | proteasome complex                                                                 | 0.014046142 |
| GOTERM_CC_ALL | plasma membrane part                                                               | 0.01599541  |
| GOTERM_CC_ALL | macromolecular complex                                                             | 0.017563509 |
| GOTERM_CC_ALL | plasma membrane                                                                    | 0.019757215 |
| GOTERM_CC_ALL | integral to plasma membrane                                                        | 0.024686834 |
| GOTERM_CC_ALL | cell fraction                                                                      | 0.025574162 |
| GOTERM_CC_ALL | intracellular                                                                      | 0.027360263 |
| GOTERM_CC_ALL | transcription elongation factor complex                                            | 0.030270781 |
| GOTERM_CC_ALL | intrinsic to plasma membrane                                                       | 0.031601698 |
| GOTERM_CC_ALL | insoluble fraction                                                                 | 0.032689935 |
| GOTERM_CC_ALL | mitochondrion                                                                      | 0.044119777 |
| GOTERM_CC_ALL | Golgi apparatus                                                                    | 0.045452489 |
| GOTERM_MF_ALL | protein binding                                                                    | 0.002116542 |
| GOTERM_MF_ALL | calcium ion binding                                                                | 0.008269431 |
| GOTERM_MF_ALL | lyase activity                                                                     | 0.009079115 |
| GOTERM_MF_ALL | ATPase activity                                                                    | 0.014946622 |
| GOTERM_MF_ALL | purine ribonucleotide binding                                                      | 0.015298056 |
| GOTERM_MF_ALL | ribonucleotide binding                                                             | 0.015298056 |
| GOTERM_MF_ALL | nucleotide binding                                                                 | 0.016959136 |
| GOTERM_MF_ALL | nucleoside-triphosphatase activity                                                 | 0.018085786 |
| GOTERM_MF_ALL | ATP binding                                                                        | 0.019597188 |
| GOTERM_MF_ALL | adenyl ribonucleotide binding                                                      | 0.023316895 |
| GOTERM_MF_ALL | catalytic activity                                                                 | 0.025609681 |
| GOTERM_MF_ALL | pyrophosphatase activity                                                           | 0.025789427 |
| GOTERM_MF_ALL | hydrolase activity, acting on acid anhydrides, in phosphorus-containing anhydrides | 0.026772356 |
| GOTERM_MF_ALL | hydrolase activity, acting on acid anhydrides                                      | 0.028048324 |
| GOTERM_MF_ALL | purine nucleotide binding                                                          | 0.028976348 |
| GOTERM_MF_ALL | hydrolase activity                                                                 | 0.033158964 |
| GOTERM_MF_ALL | protein domain specific binding                                                    | 0.033334378 |
| GOTERM_MF_ALL | purine nucleoside binding                                                          | 0.034467633 |
| GOTERM_MF_ALL | nucleoside binding                                                                 | 0.037486804 |
| GOTERM_MF_ALL | hydrolase activity, hydrolyzing N-glycosyl compounds                               | 0.037629334 |
| GOTERM_MF_ALL | peptide binding                                                                    | 0.038452539 |
| GOTERM_MF_ALL | adenyl nucleotide binding                                                          | 0.044063242 |
